# Supplementary material
Source: publisher figshare collection journal article supplement (https://acs.figshare.com/ndownloader/files/3583944)

**Supplementary Figure S1.** 433 phosphotyrosine peptides with or without SILAC quantification (redundant) were identified across four experiments, giving a total of 177 non-redundant peptides. The overlap between experiments is shown (Four-way Venn diagram plotter: Oliveros, J.C. (2007) VENNY. ).

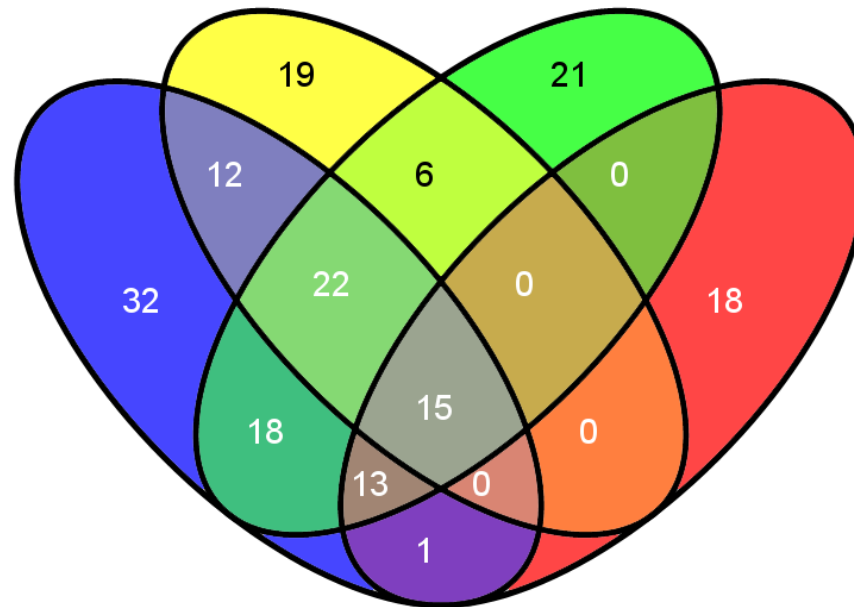

**Supplementary Figure S2.** 303 phosphotyrosine peptides with SILAC quantitation (redundant) were identified across three experiments, giving a total of 139 non-redundant peptides. The overlap between experiments is shown (Area-proportional Venn diagram plotter: Littlefield & Monroe, PNNL).

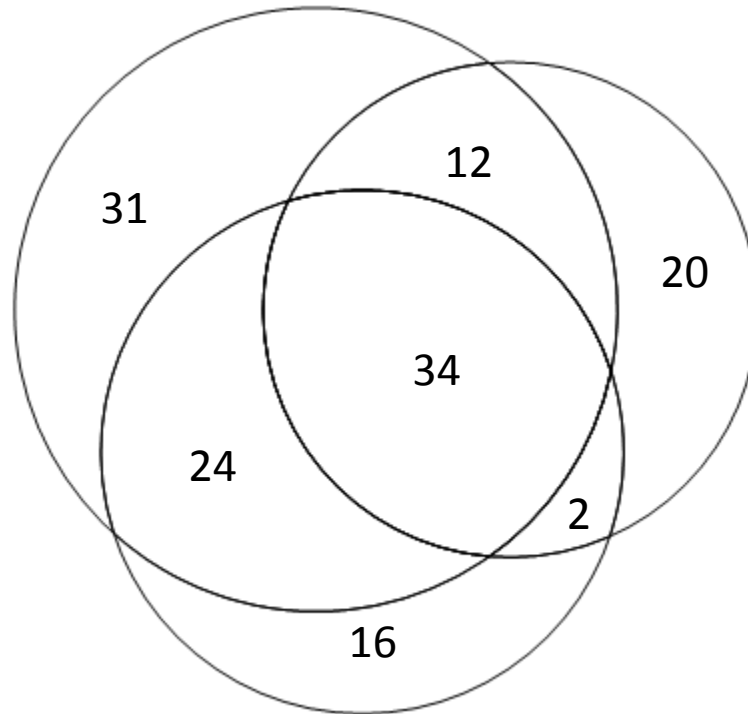

Supplement: Supplementary file 1 [file 3583944]
